# Supplementary material for: Brønsted acid-catalyzed efficient Strecker reaction of ketones, amines and trimethylsilyl cyanide
Source: Royal Society of Chemistry journal article supplement (doi:10.1039/b924272d), 2010-01-01
Supplement: b924272d.pdf [file b924272d.pdf]

## Electronic Supplementary Information

# Brønsted Acid-catalyzed Efficient Strecker Reaction of Ketones, Amines and Trimethylsilyl Cyanide

Guang-Wu Zhang,<sup>a</sup> Dong-Hua Zheng,<sup>a</sup> Jing Nie,<sup>a</sup> Teng Wang,<sup>a</sup> Jun-An Ma\*<sup>a, b</sup>

<sup>a</sup> *Department of Chemistry, Tianjin University, Tianjin 300072, China.*

*majun\_an68@tju.edu.cn*

<sup>b</sup> *Key Laboratory of Organofluorine Chemistry, Shanghai Institute of Organic Chemistry, Chinese Academy of Science.*

## General details

Unless otherwise noted, all commercially available compounds and solvents were used as provided without further purification.  $^1\text{H}$ ,  $^{13}\text{C}$  were recorded on Varian Mercury Plus 500 instruments at 500 MHz ( $^1\text{H}$  NMR), 125 MHz ( $^{13}\text{C}$  NMR). Chemical shifts were reported in ppm from the solvent resonance as the internal standard ( $\text{CDCl}_3$ : 7.26 ppm). MS were recorded on a VG-7070E or HP 5988A spectrometer using the ESI method. HPLC analyses were carried out on a Hewlett Packard Model HP 1200 instrument. All of the reactions were carried out under an argon atmosphere with the exclusion of moisture.

**2a**,<sup>1</sup> **2b**,<sup>2</sup> **2d**,<sup>1</sup> **2e**,<sup>2</sup> **2t**,<sup>2</sup> **2u**,<sup>2</sup> **2v**,<sup>3</sup> **2w**,<sup>2</sup> **2x**,<sup>4</sup> **2z**<sup>5</sup> were known compounds in the literatures.

- 
1. H. K. Shukla, R. R. Astik, K. A. Thaker, *J. Indian. Chem. Soc.* **1981**, 58, 1182.
  2. G. K. S. Prakash, T. Mathew, C. Panja, S. Alconcel, H. Vaghoo, C. Do, G. A. Olah, *Proc. Natl. Acad. Sci. U.S.A.* **2007**, 104, 3703.
  3. K. Matsumoto, J. C. Kim, H. Iida, H. Hamana, K. Kumamoto, H. Kotsuki, G. Jenner, *Helv. Chim. Acta* **2005**, 88, 1734.
  4. R. M. Alvarez, A. S. Vazquez, M. Hananck, L. R. Subramanian, *J. Phys. Org. Chem.* **1996**, 9, 227.
  5. G. W. Hardy, P. M. Doyle, T. W. Smith, *Eur. J. Med. Chem.* **1987**, 22, 331.

$^1\text{H}$  and  $^{13}\text{C}$  NMR Spectra for the new compounds:

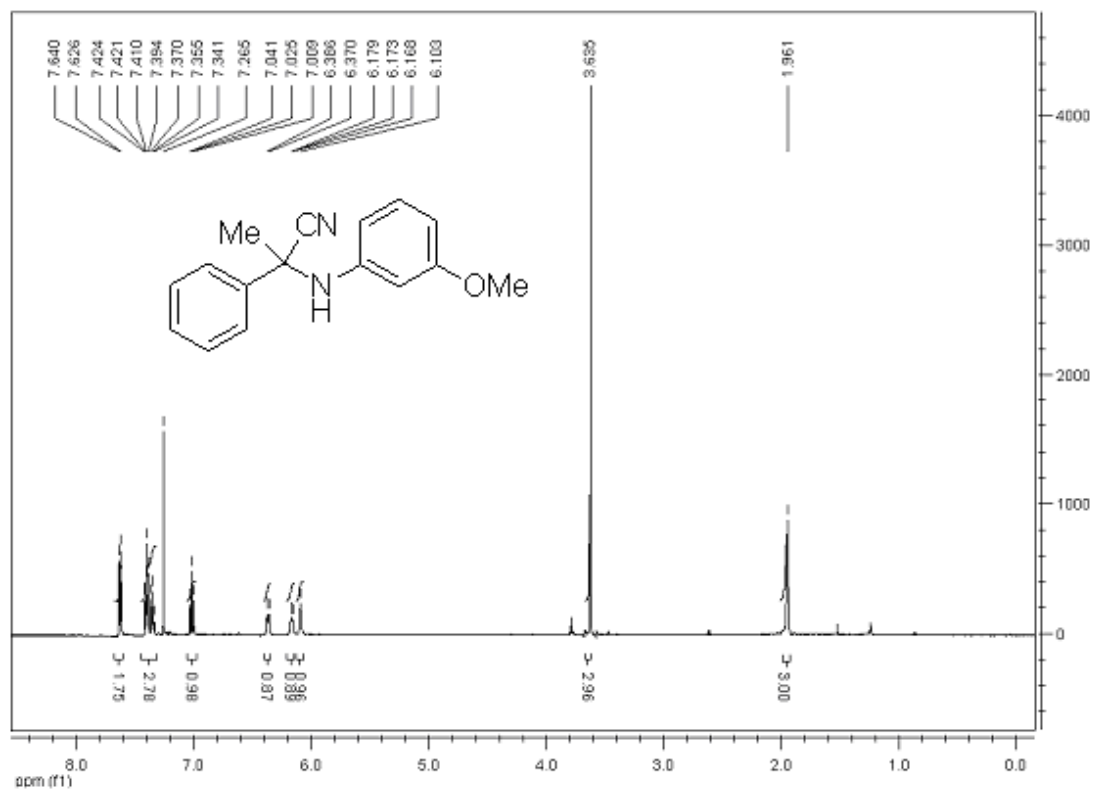

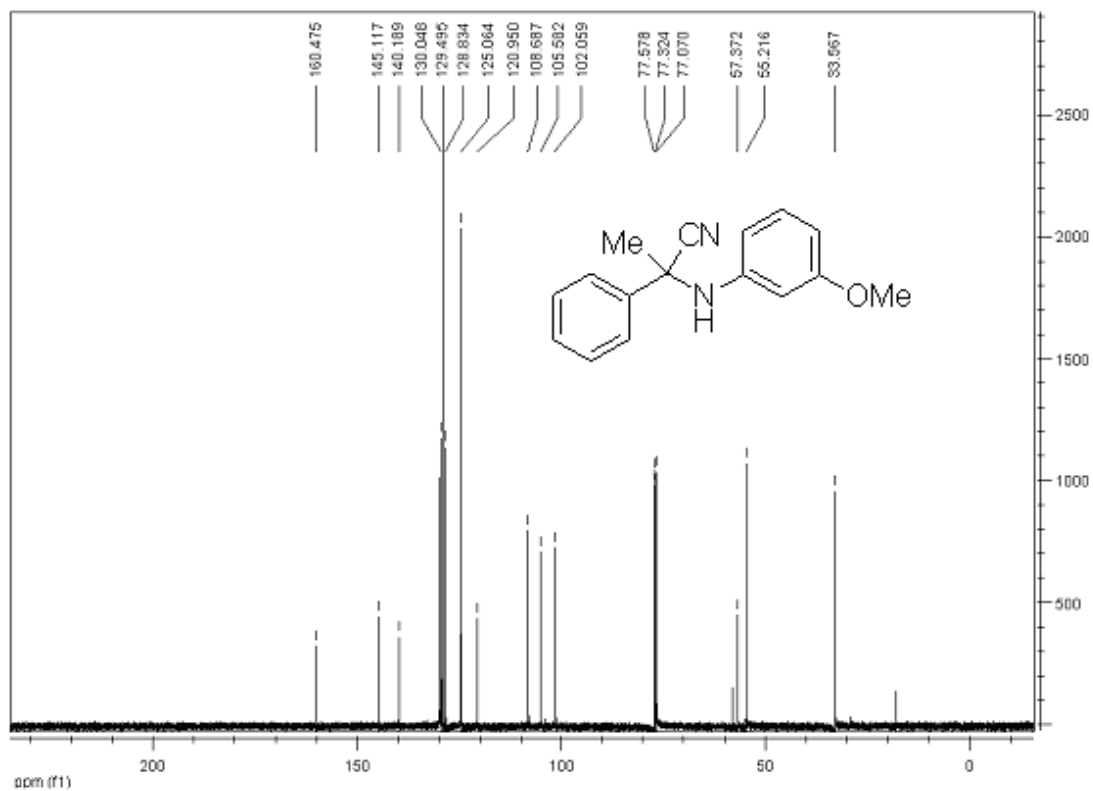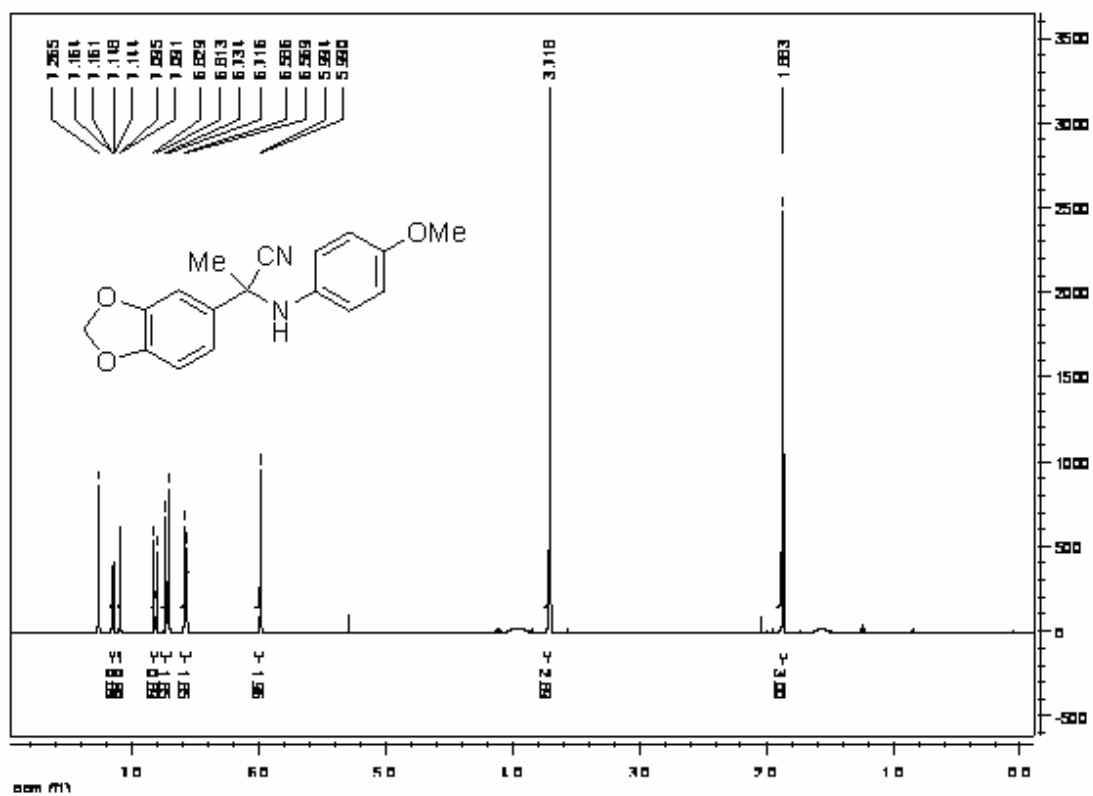

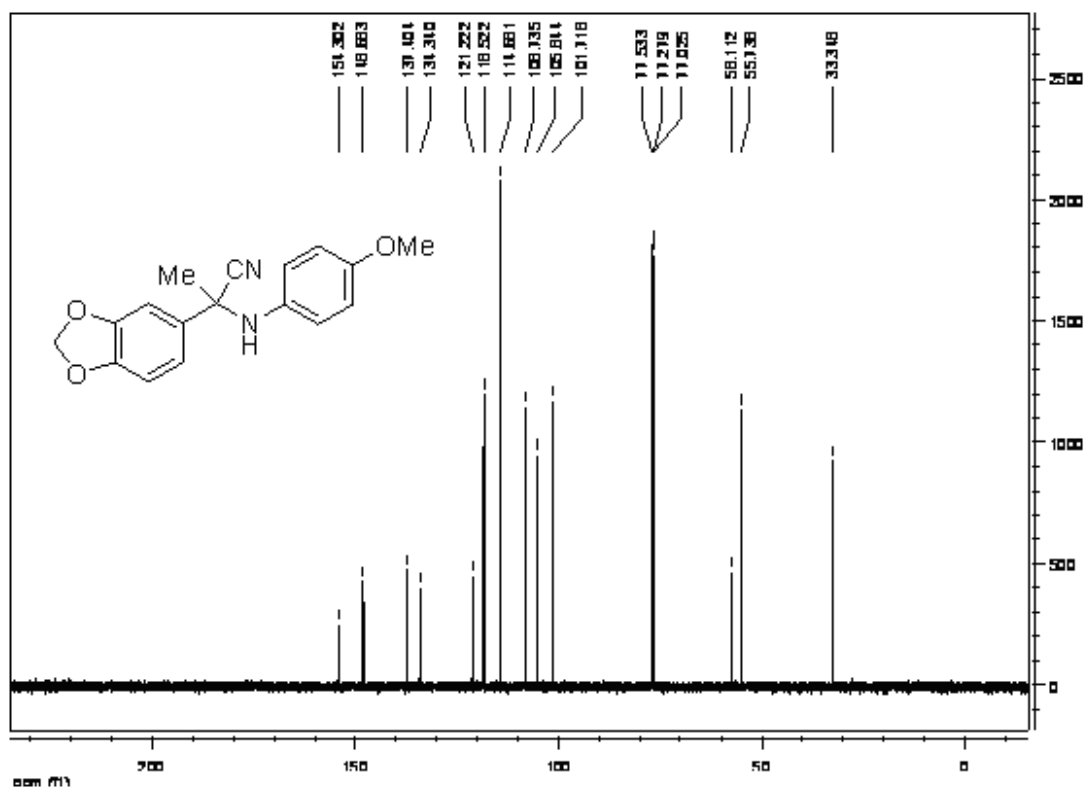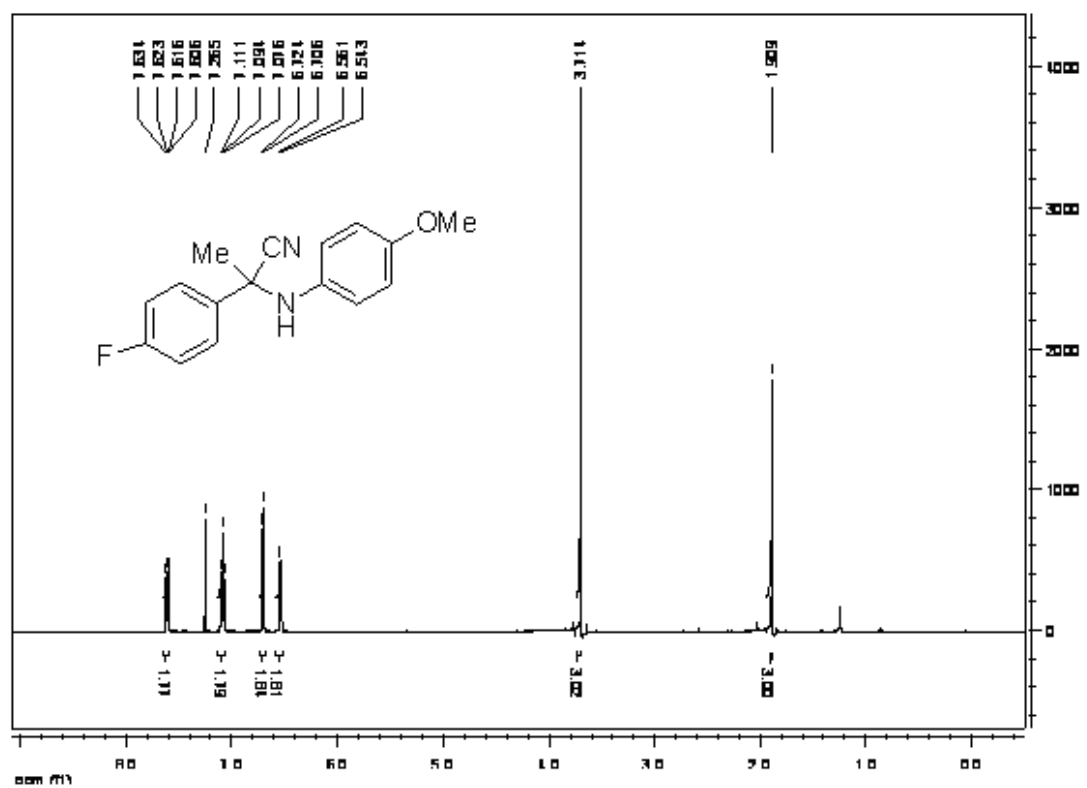

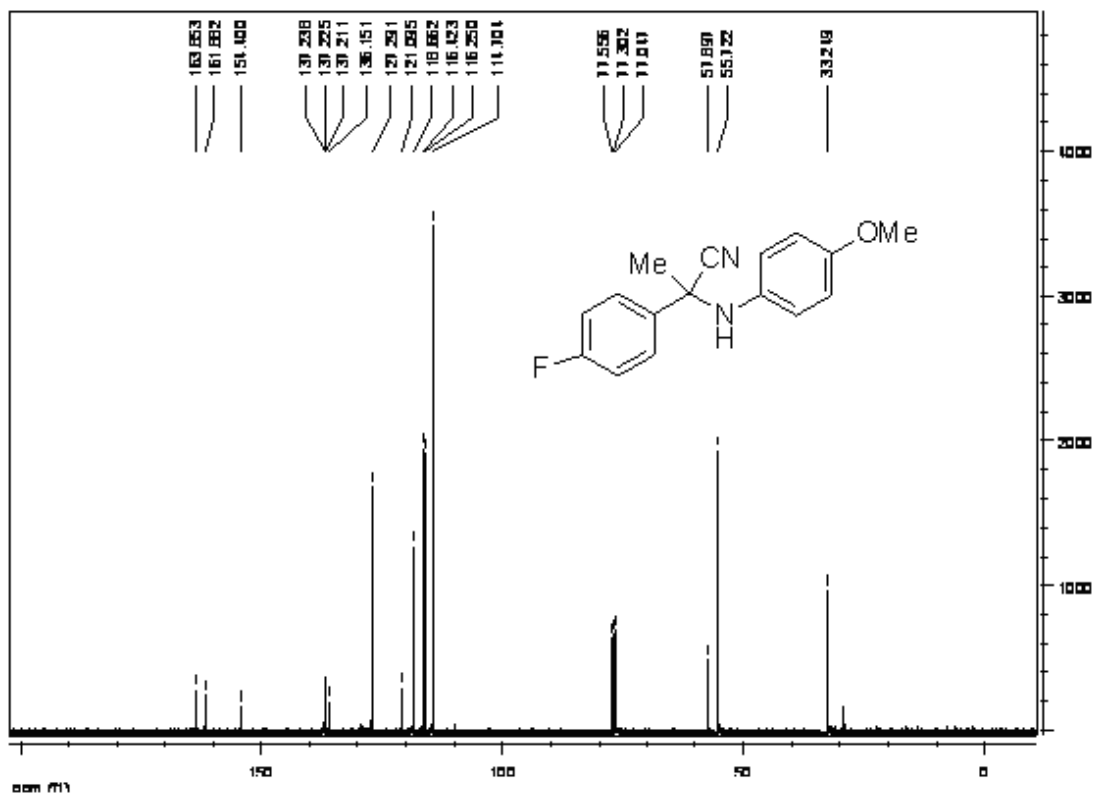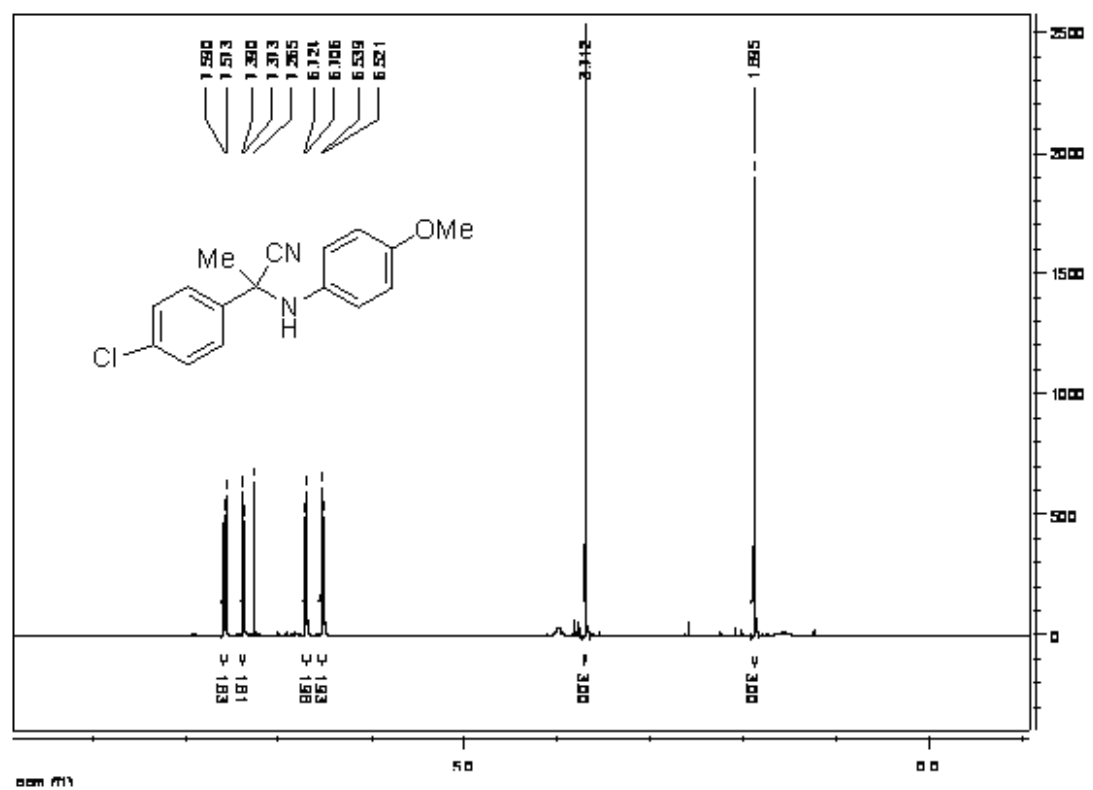

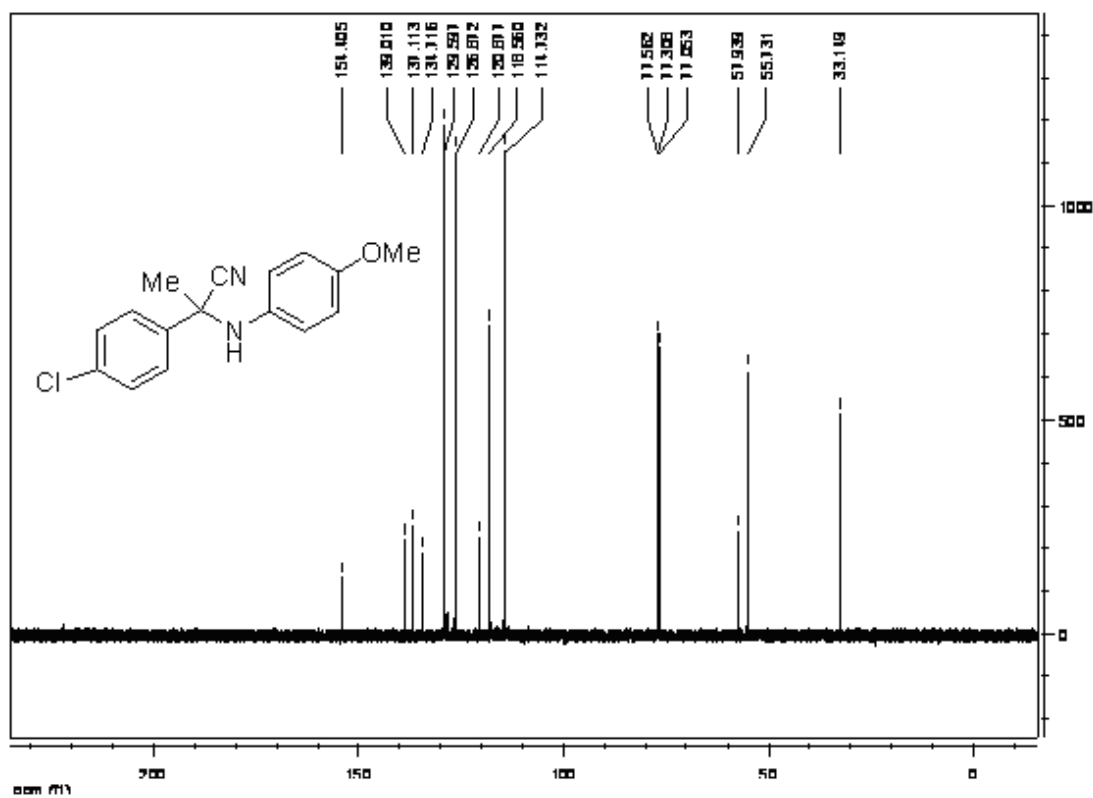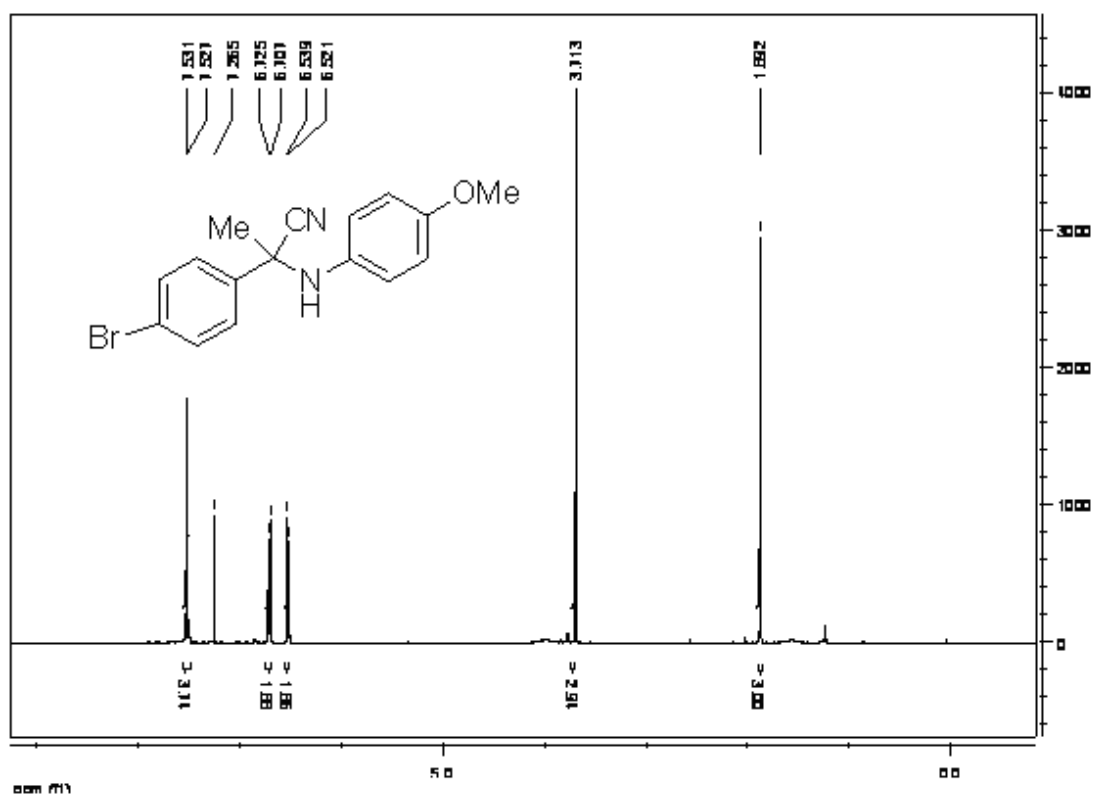

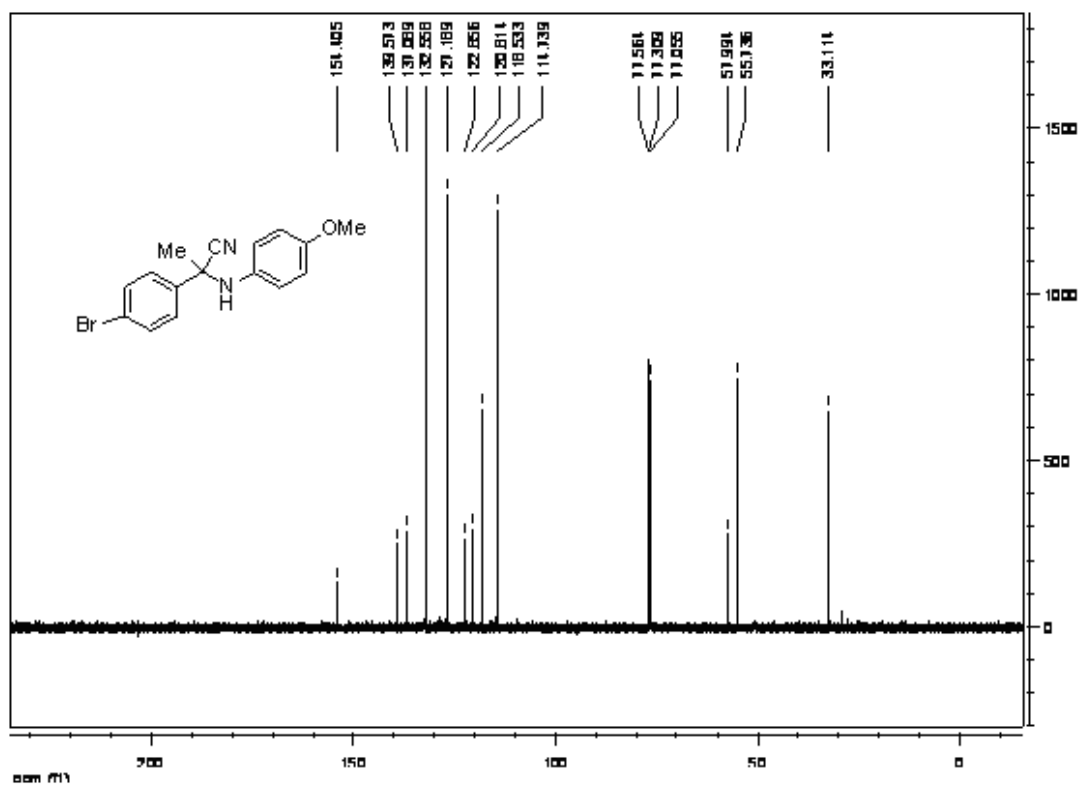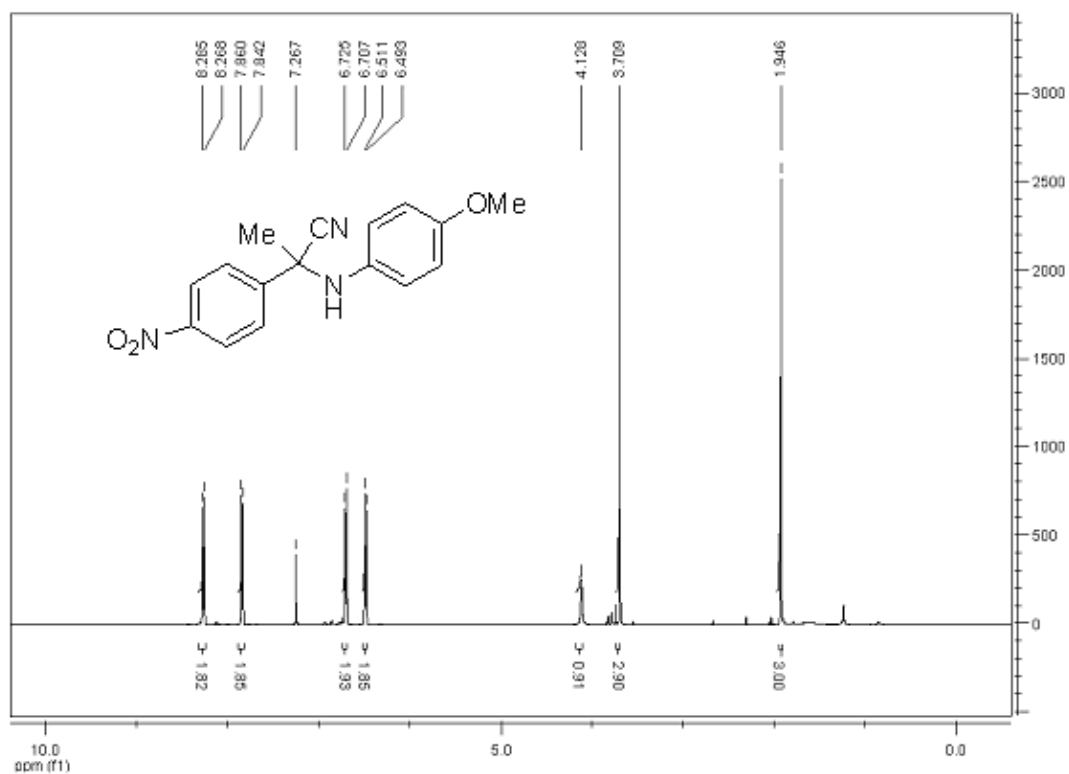



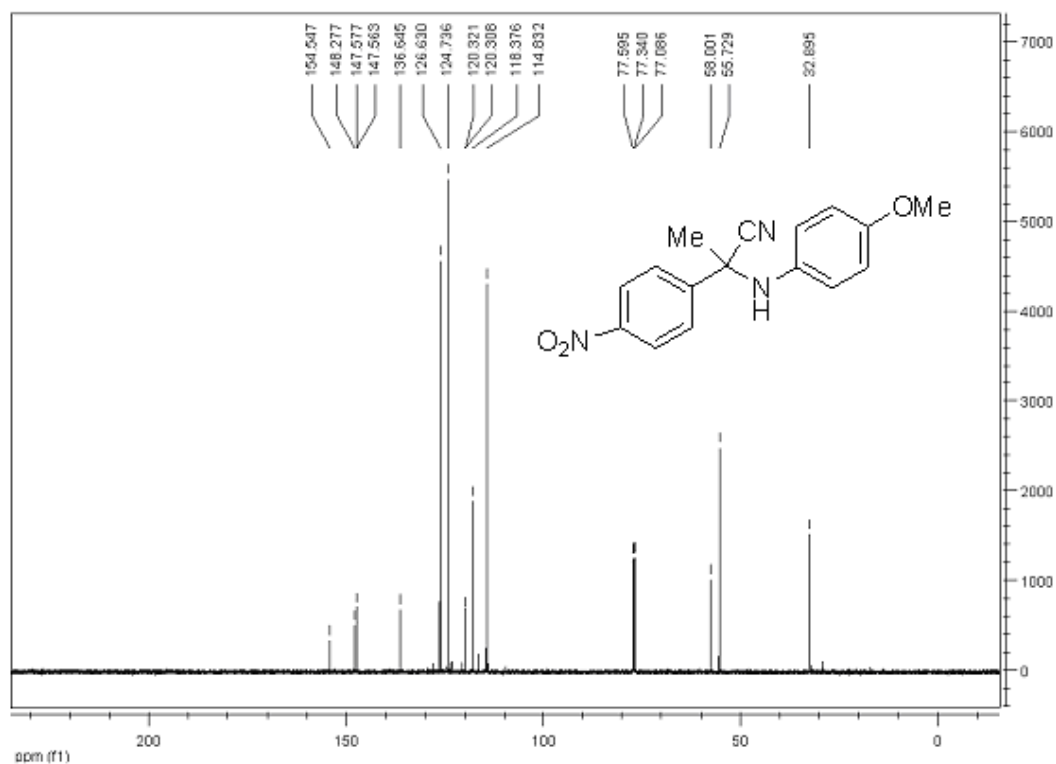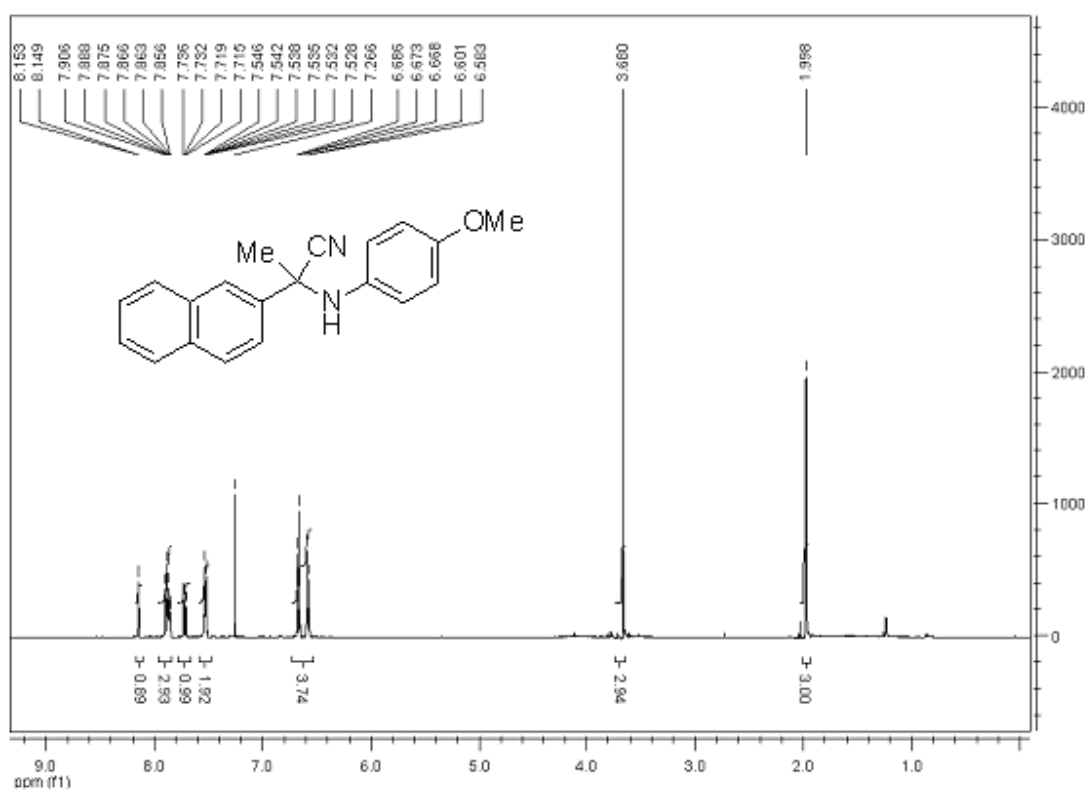

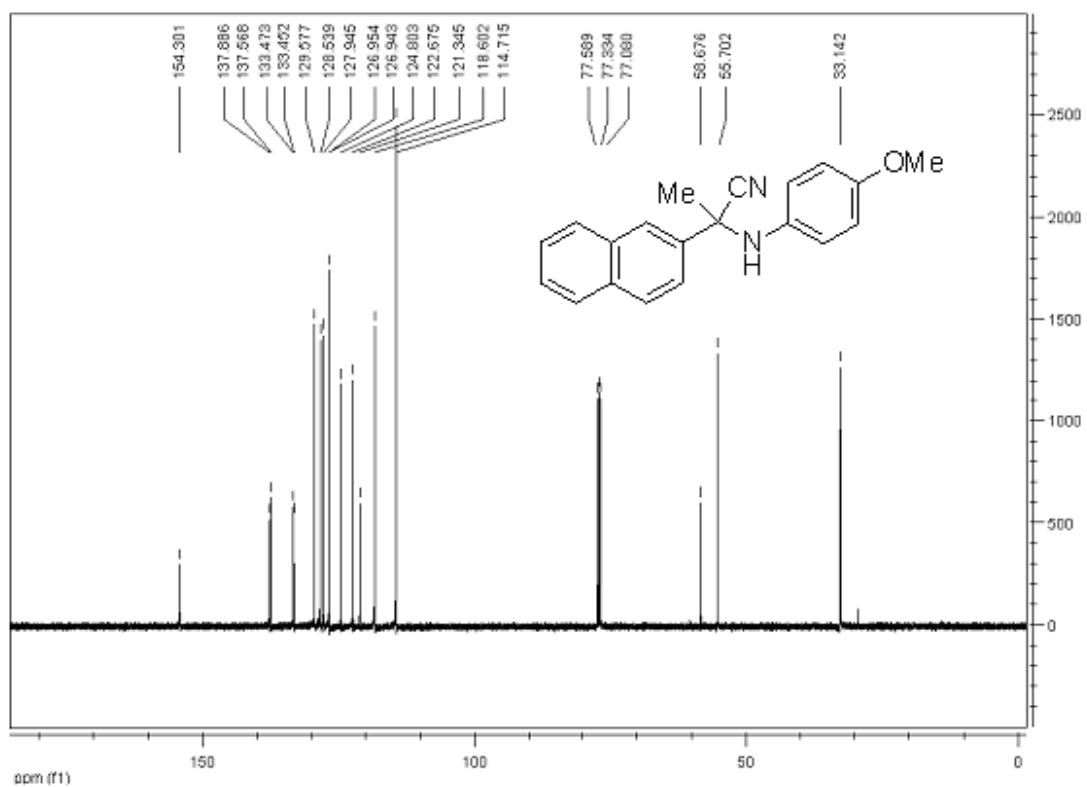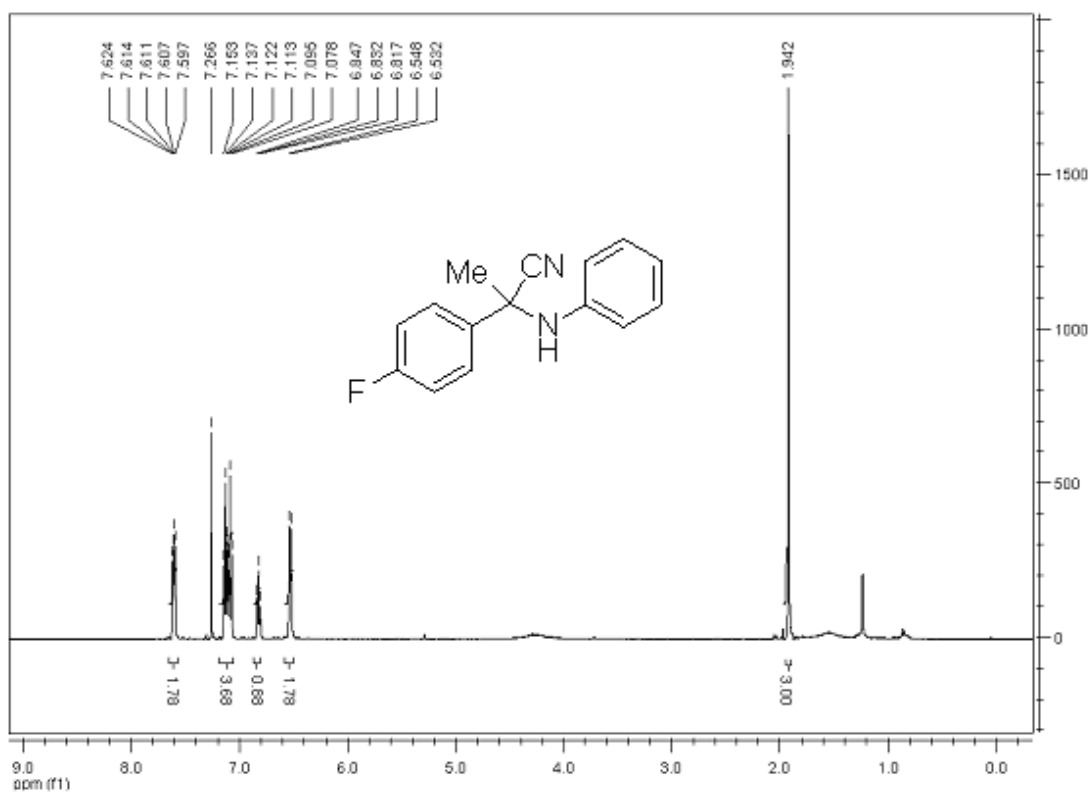

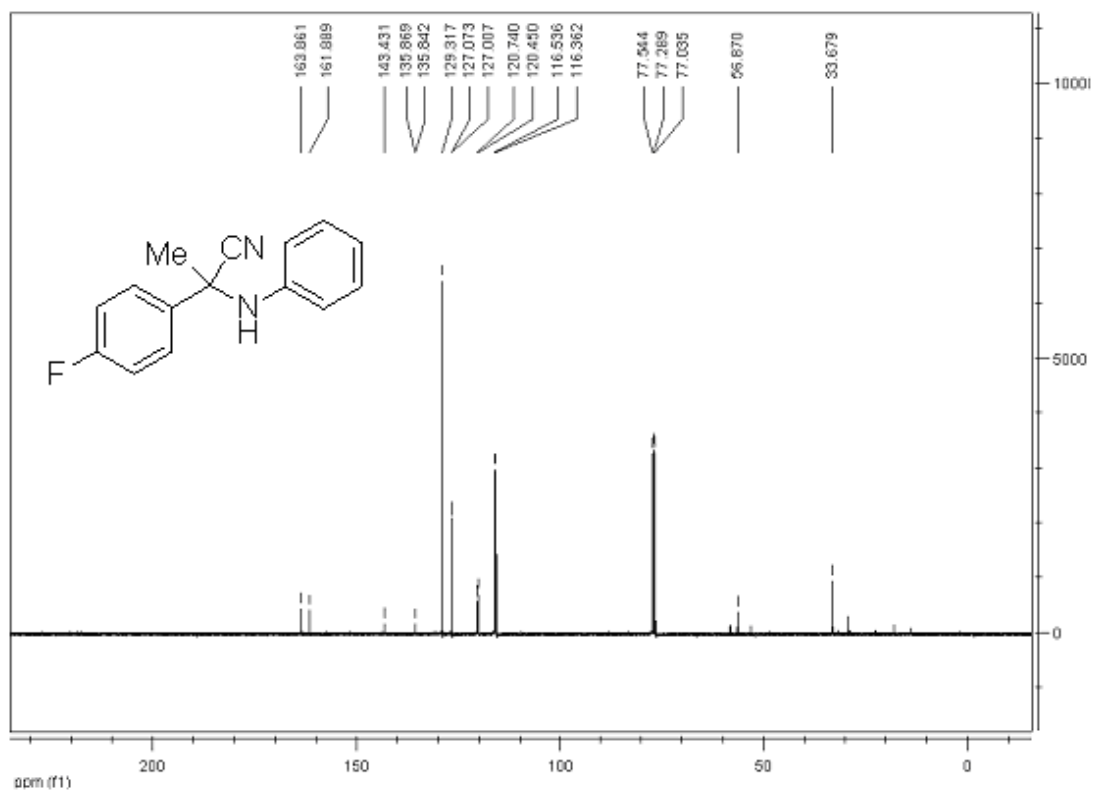

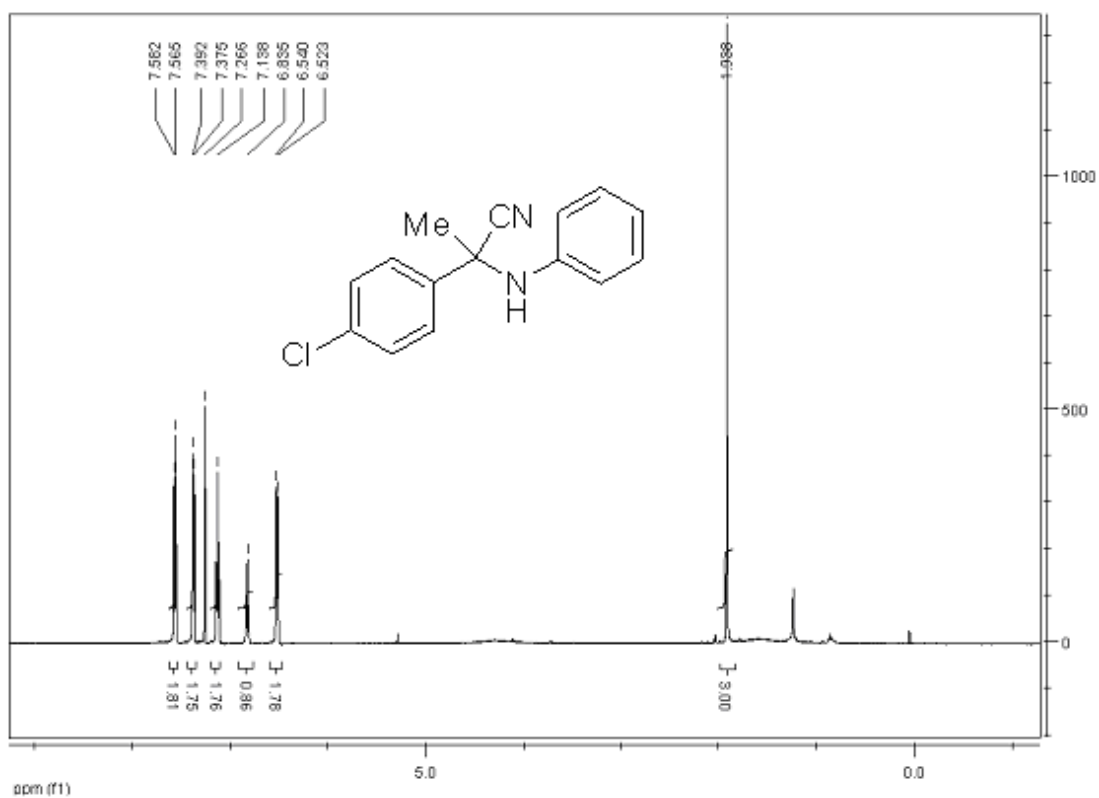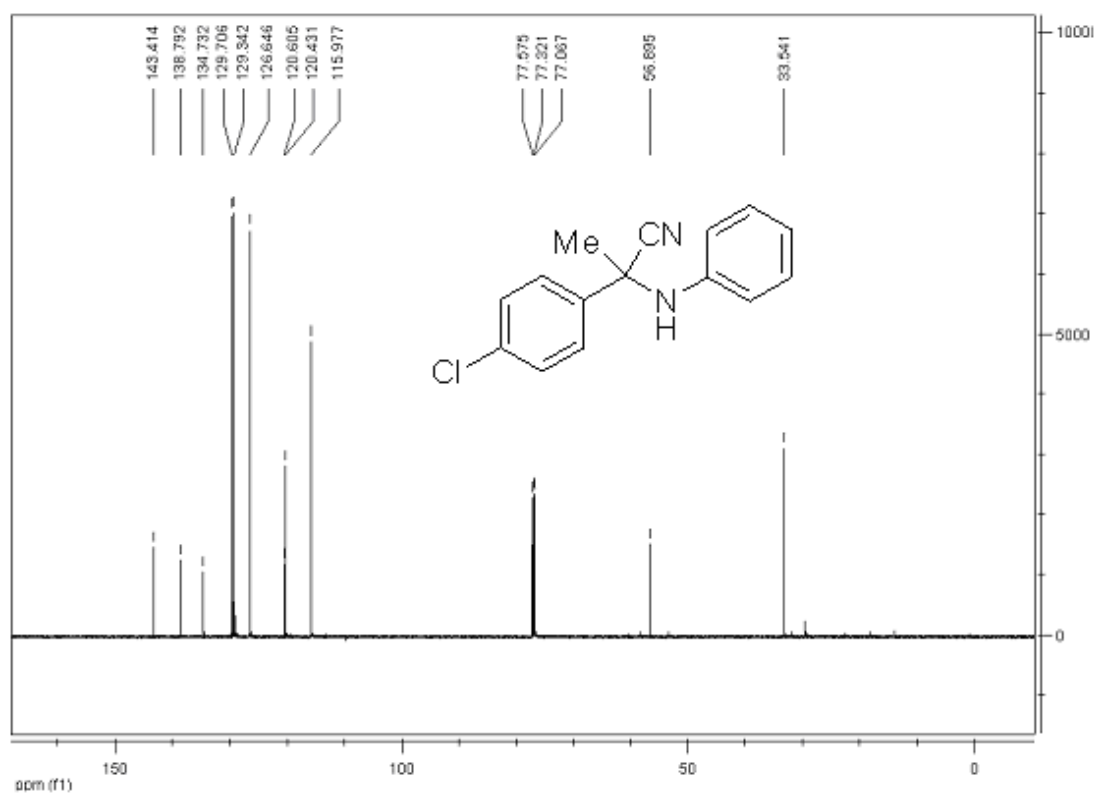

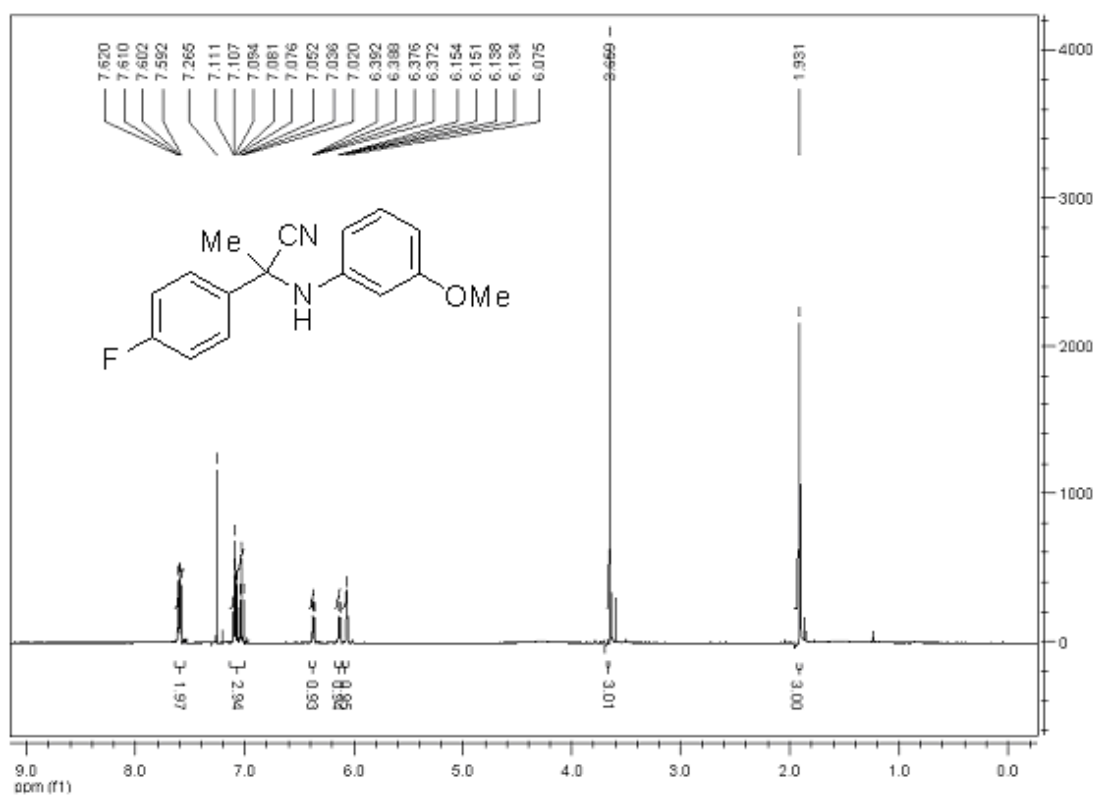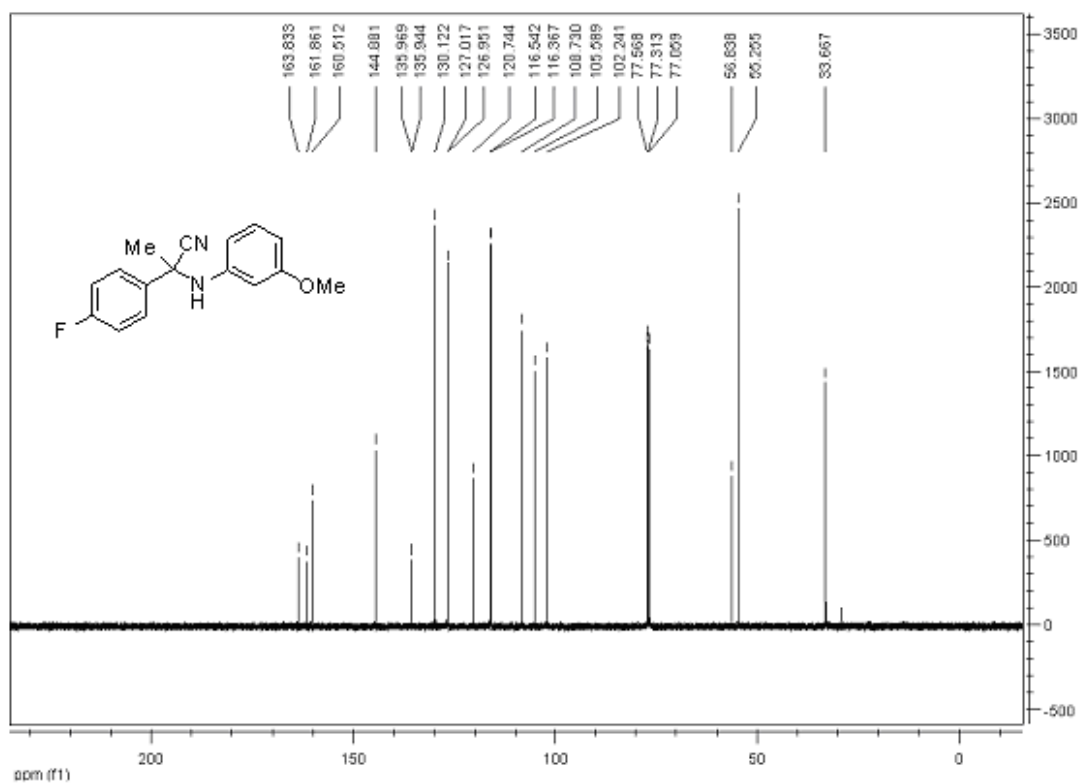

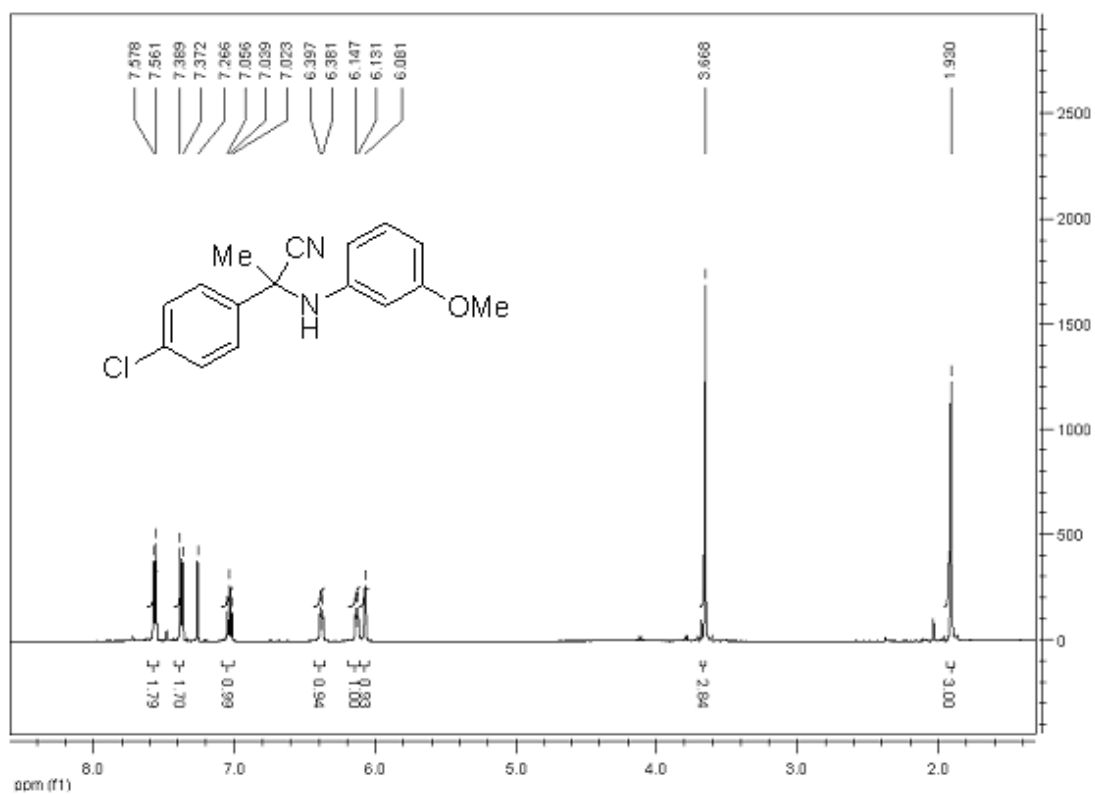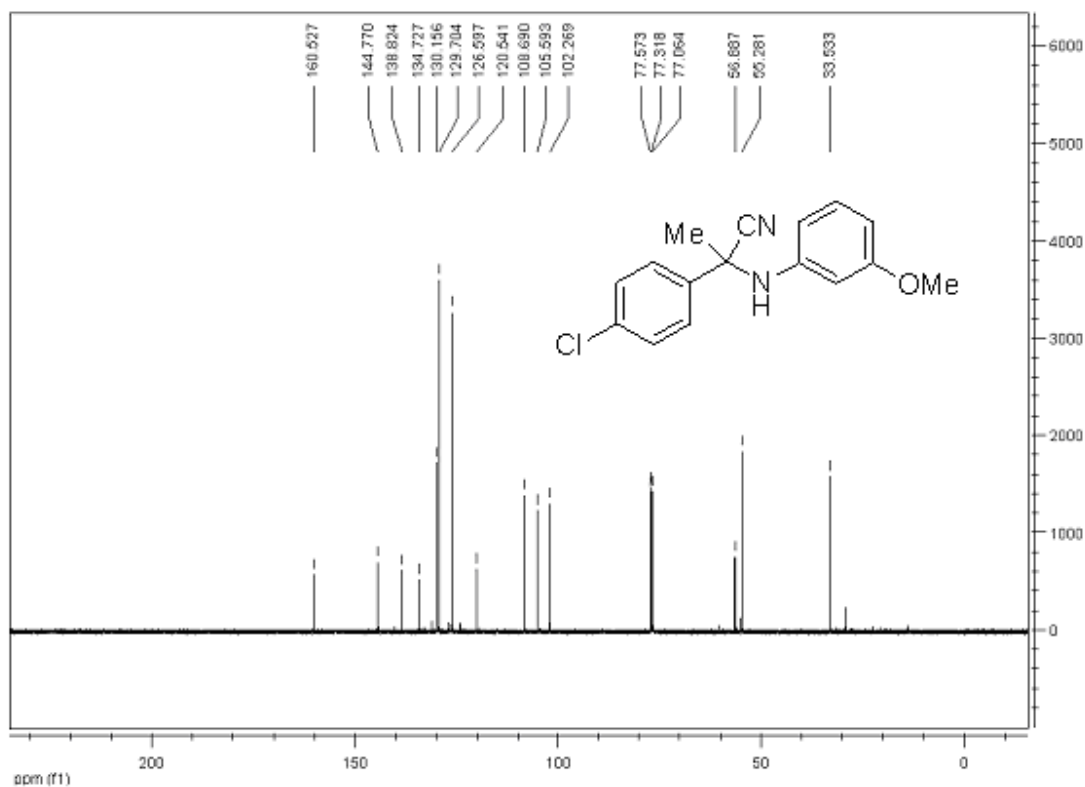

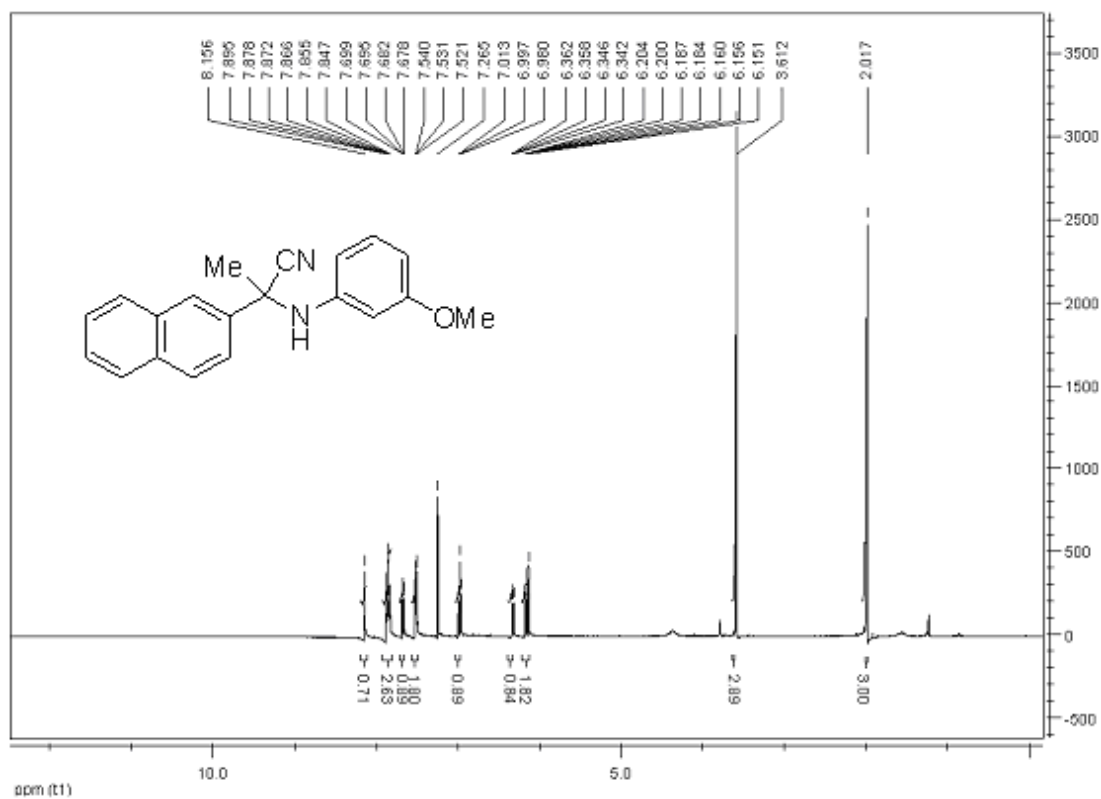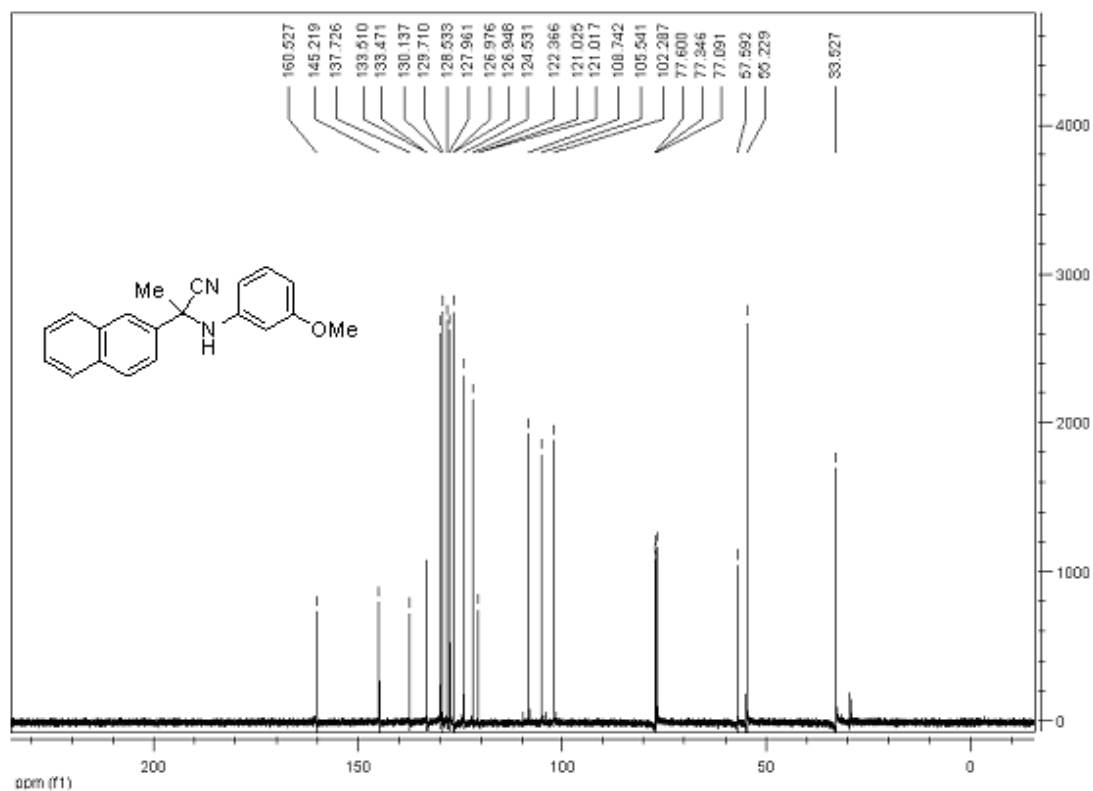

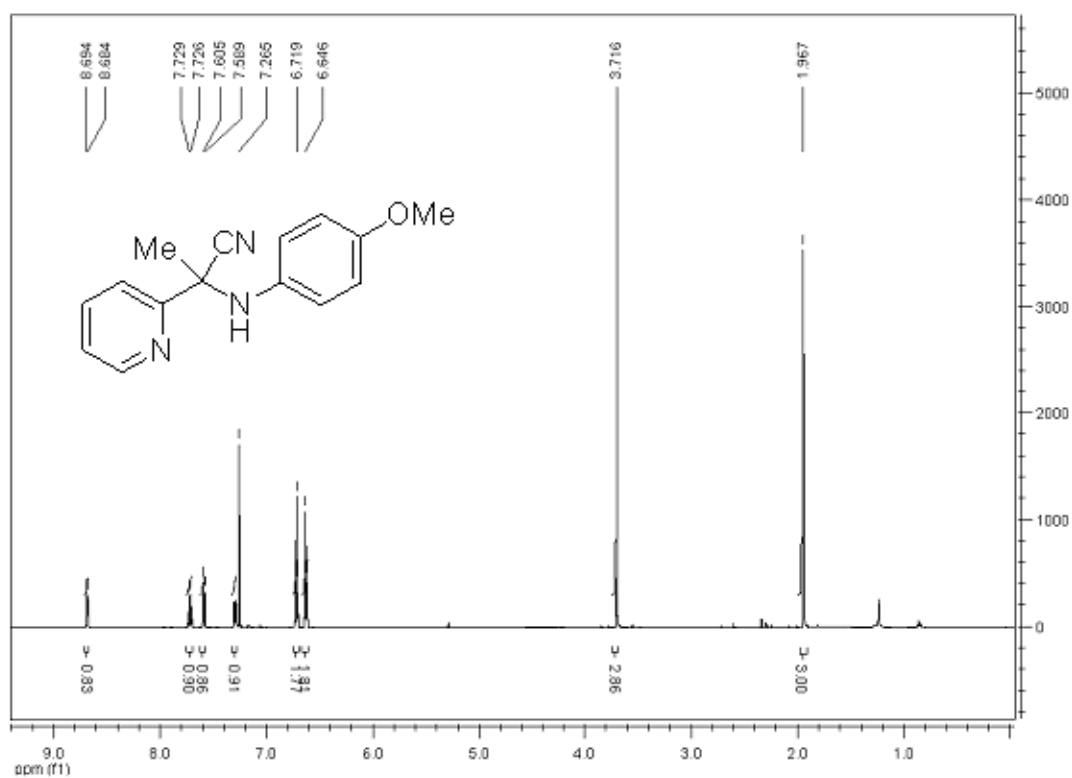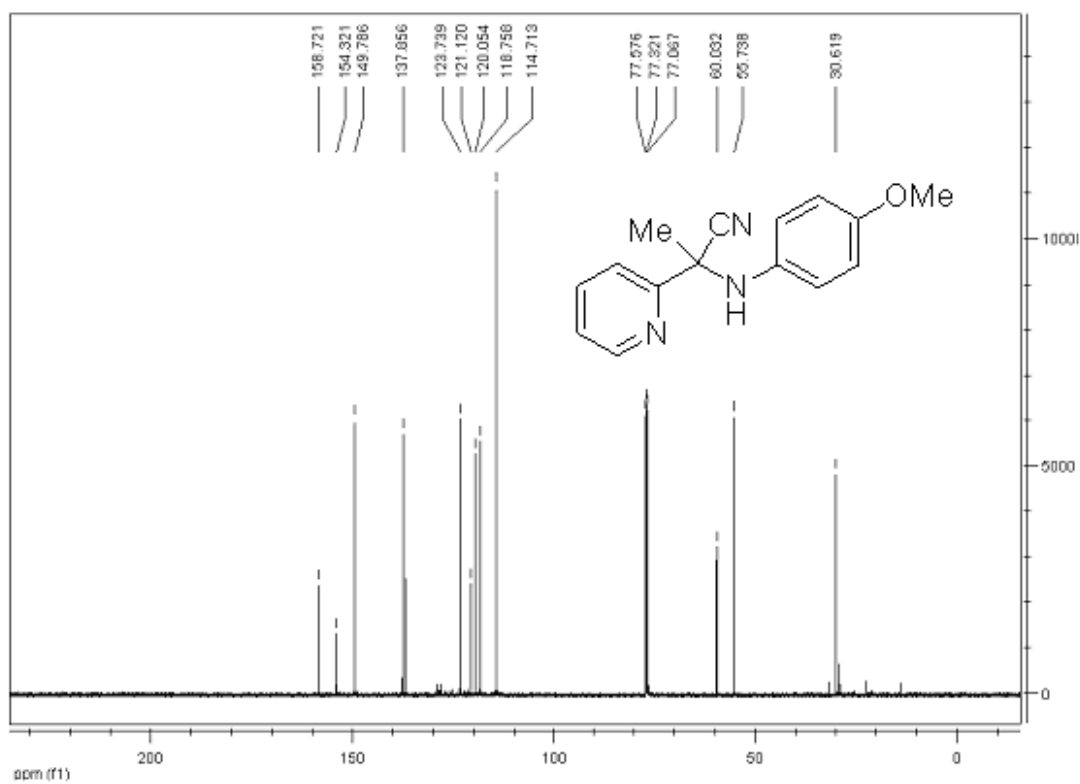



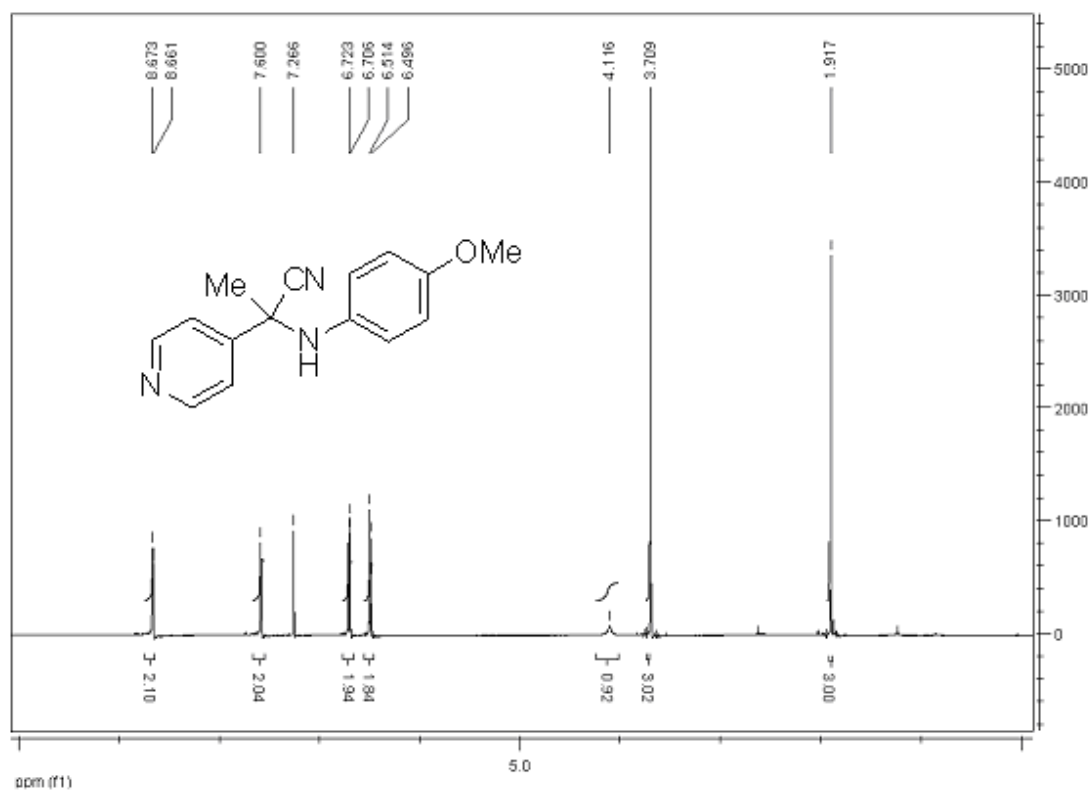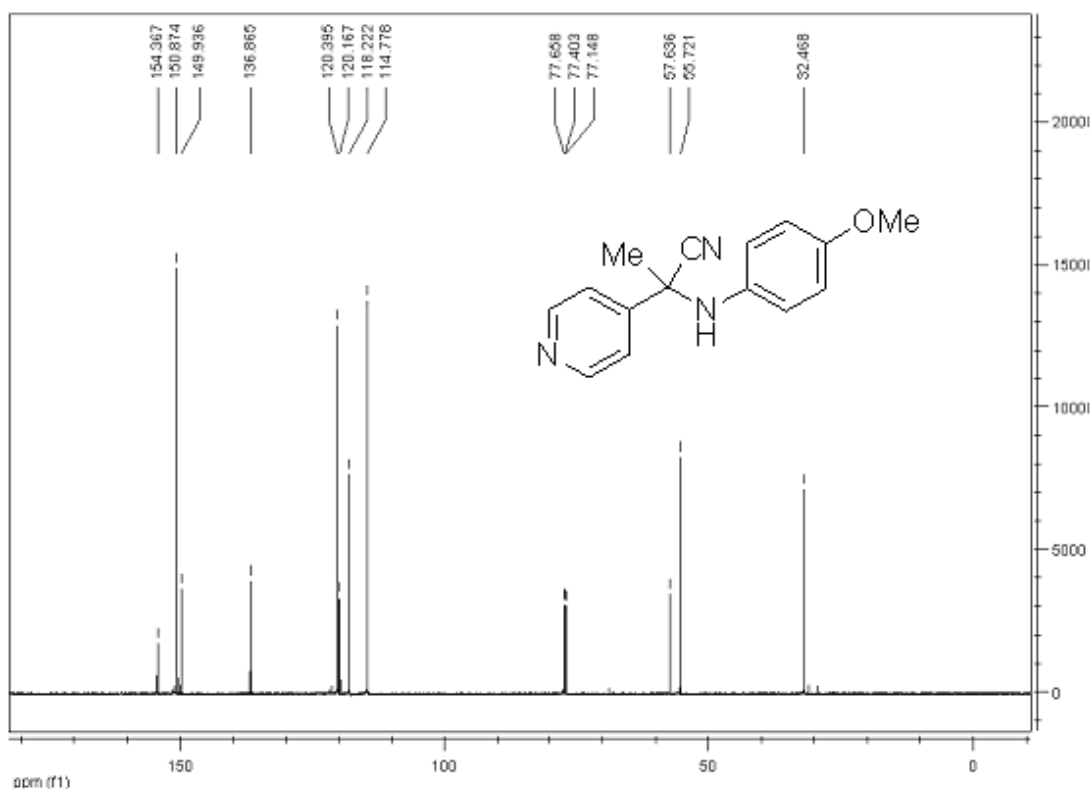

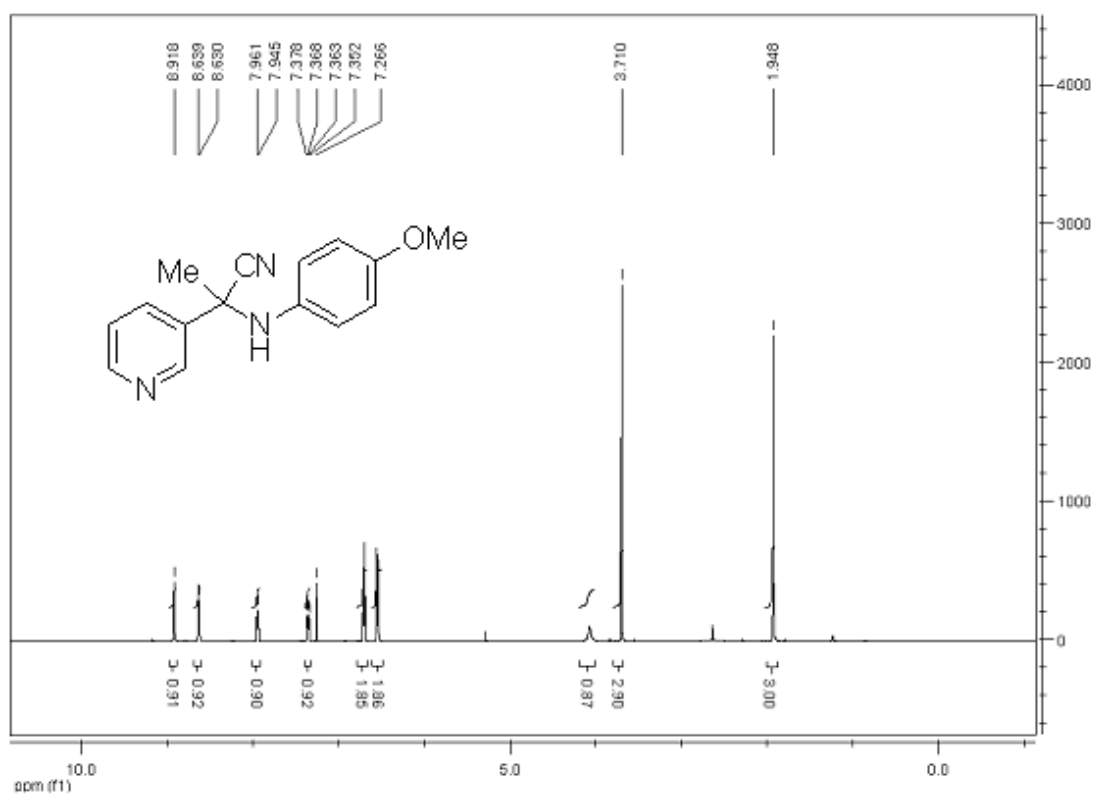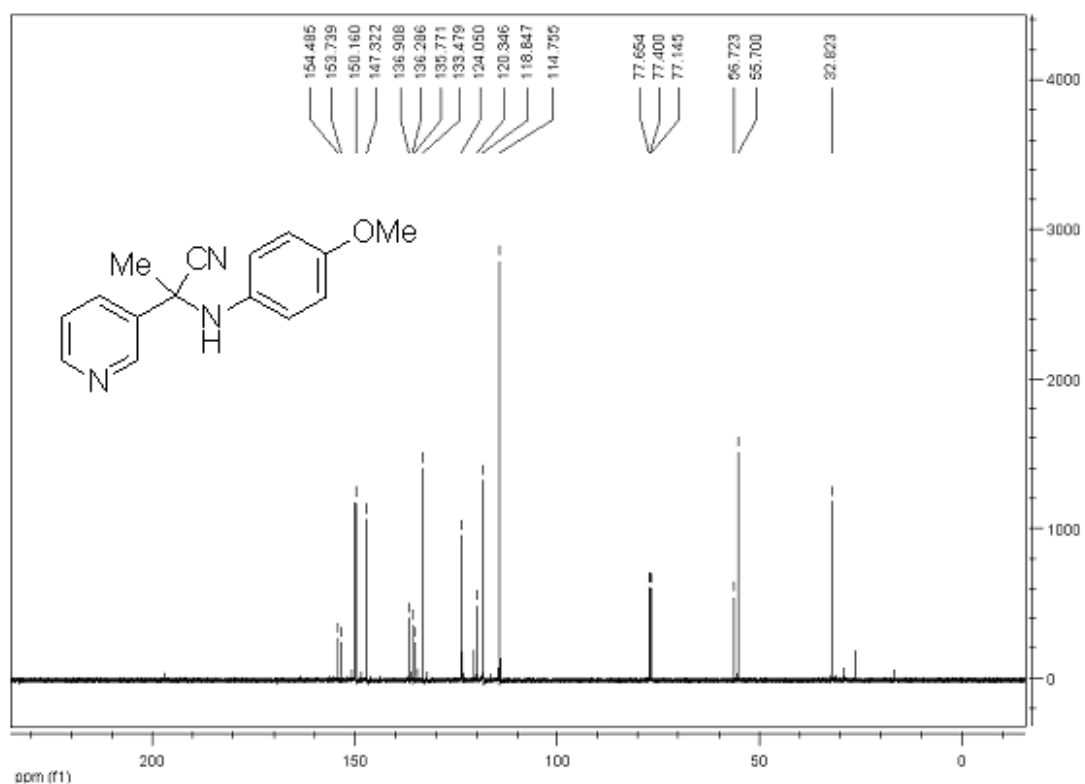

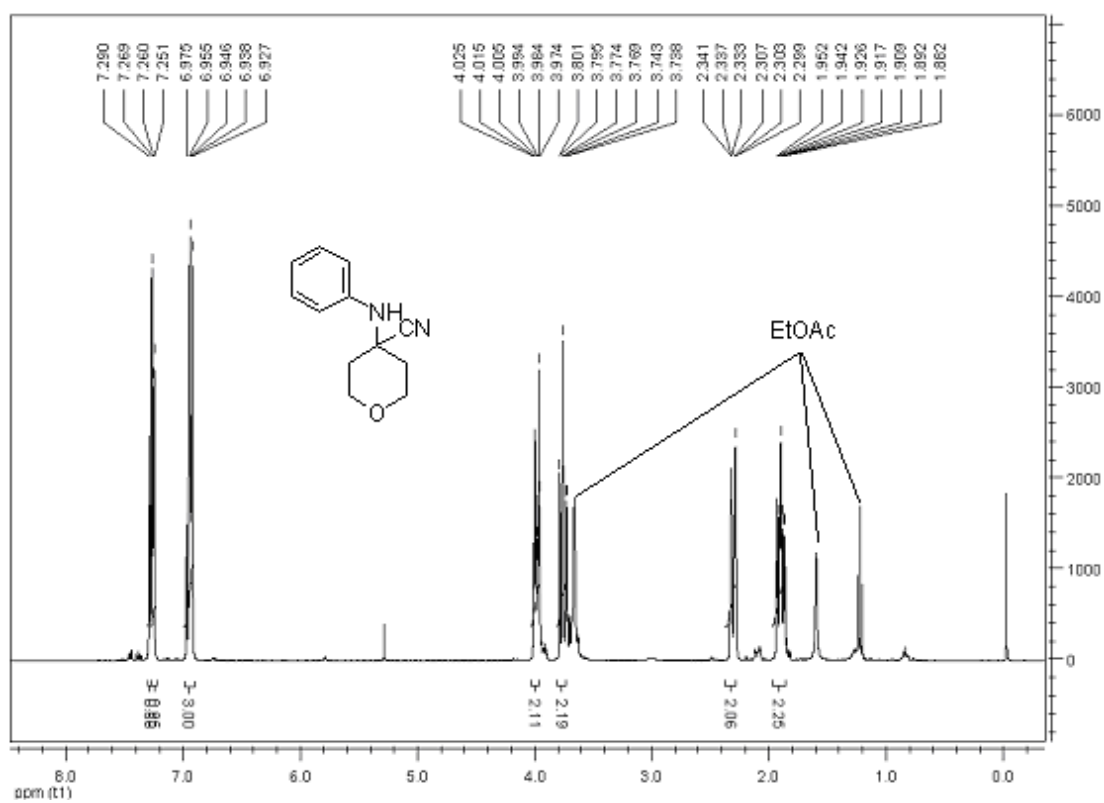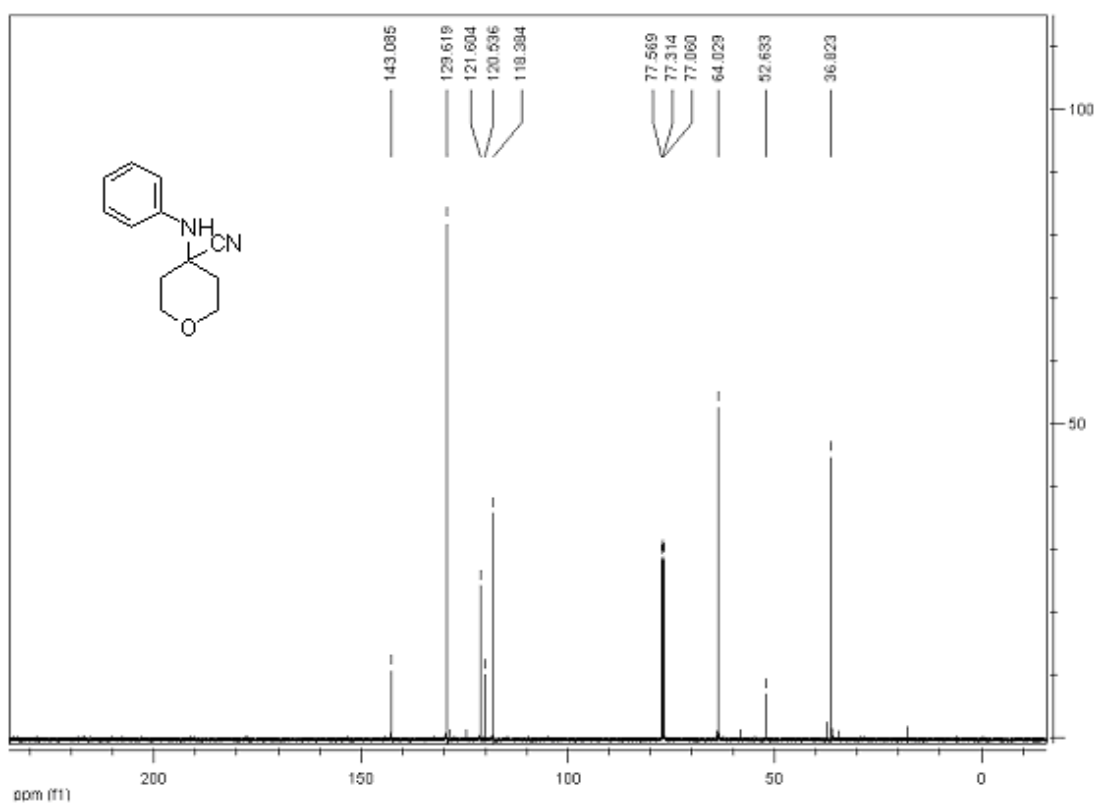

## Screening of catalysts and reaction conditions for the three-component reaction

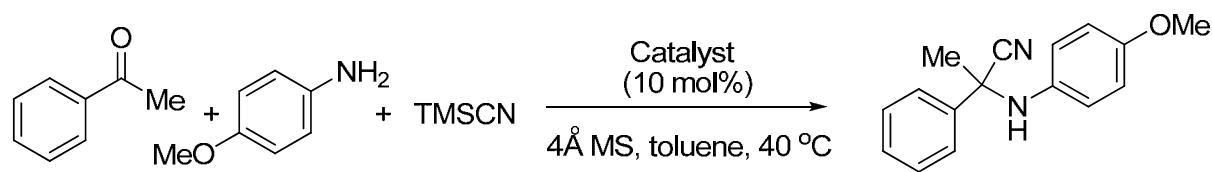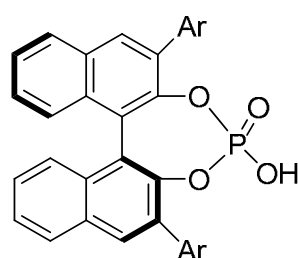

- 3:** Ar = 9-Phenanthrenyl
- 4:** Ar = H
- 5:** Ar = Ph
- 6:** Ar = 4-NO<sub>2</sub>C<sub>6</sub>H<sub>4</sub>
- 7:** Ar = 4-PhC<sub>6</sub>H<sub>4</sub>
- 8:** Ar = 1-Np
- 9:** Ar = 9-Anthy
- 10:** Ar = SiPh<sub>3</sub>
- 11:** Ar = 2, 4, 6-(*i*Pr)<sub>3</sub>C<sub>6</sub>H<sub>2</sub>
- 12:** Ar = 3, 5-(CF<sub>3</sub>)<sub>2</sub>C<sub>6</sub>H<sub>3</sub>

| entry | Catalyst (10 mol%) | Yield (%) <sup>b</sup> | Ee (%) <sup>c</sup> |
|-------|--------------------|------------------------|---------------------|
| 1     | <b>3</b>           | 73                     | 40                  |
| 2     | <b>4</b>           | 74                     | <3                  |
| 3     | <b>5</b>           | 77                     | 8                   |
| 4     | <b>6</b>           | 71                     | <3                  |
| 5     | <b>7</b>           | 47                     | 9                   |
| 6     | <b>8</b>           | 54                     | 31                  |
| 7     | <b>9</b>           | 72                     | 34                  |
| 8     | <b>10</b>          | 66                     | 23                  |
| 9     | <b>11</b>          | 77                     | 18                  |
| 10    | <b>12</b>          | 48                     | 11                  |

HPLC Charts for the compounds of **2a**, **2b** and **2g**.

Sample Info : 254nm,i-PrOH:Hexane=20:80,AD-H,0.5mL/min

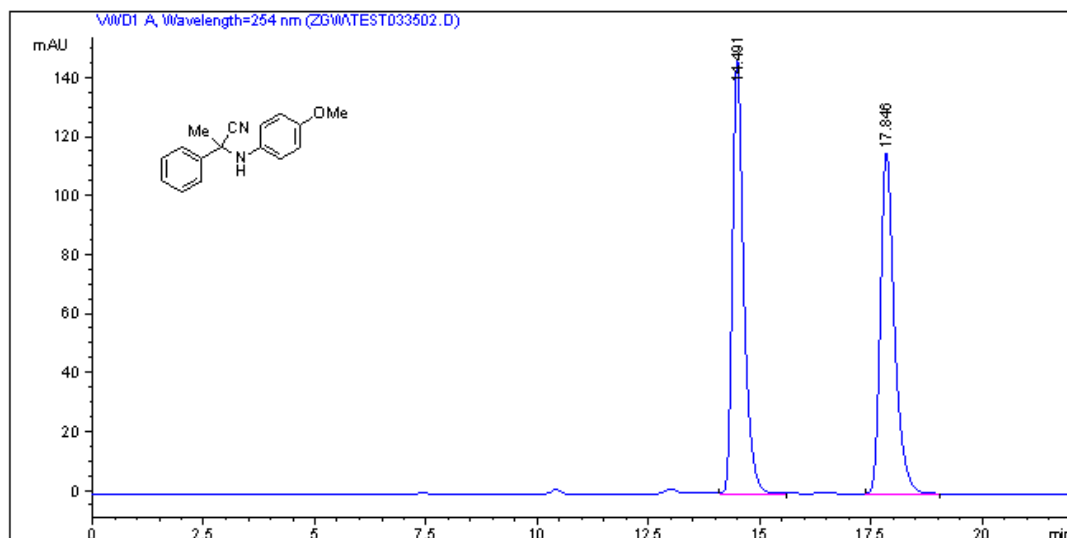

Signal 1: VWD1 A, Wavelength=254 nm

| Peak # | RetTime [min] | Type | Width [min] | Area mAU *s | Height [mAU] | Area %  |
|--------|---------------|------|-------------|-------------|--------------|---------|
| 1      | 14.491        | BB   | 0.2644      | 2606.17896  | 147.49576    | 50.6747 |
| 2      | 17.846        | BB   | 0.3318      | 2536.77563  | 115.55373    | 49.3253 |

Totals : 5142.95459 263.04949

Sample Info : 254nm,i-PrOH:Hexane=20:80,AD-H,0.5mL/min

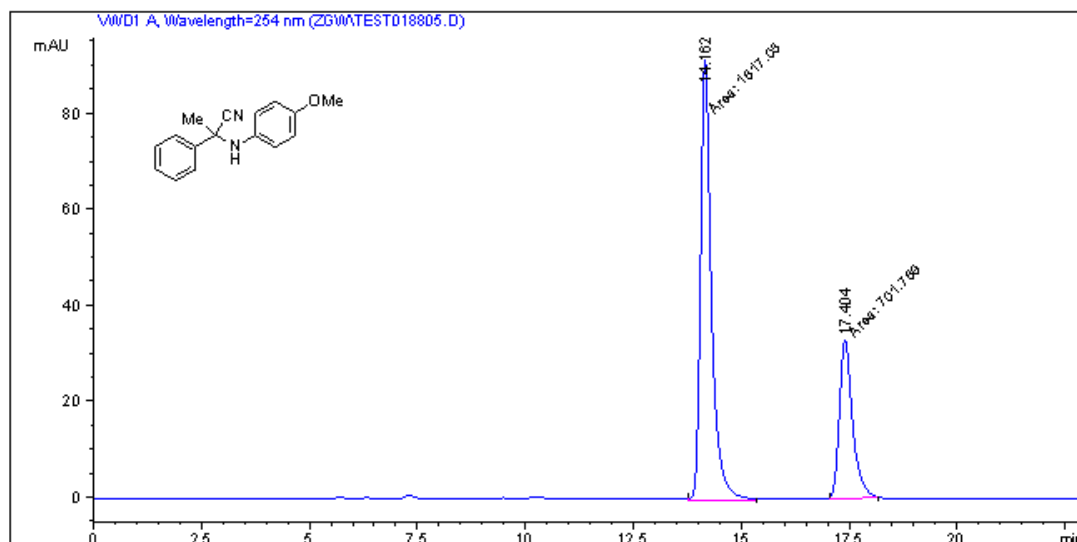

Signal 1: VWD1 A, Wavelength=254 nm

| Peak # | RetTime [min] | Type | Width [min] | Area mAU *s | Height [mAU] | Area %  |
|--------|---------------|------|-------------|-------------|--------------|---------|
| 1      | 14.162        | MM   | 0.2936      | 1617.02759  | 91.78716     | 69.7350 |
| 2      | 17.404        | MM   | 0.3531      | 701.78888   | 33.12692     | 30.2650 |

Totals : 2318.81647 124.91409

Sample Info : 254nm,AD-H,i-PrOH:Hexane=20:80,0.5mL/min

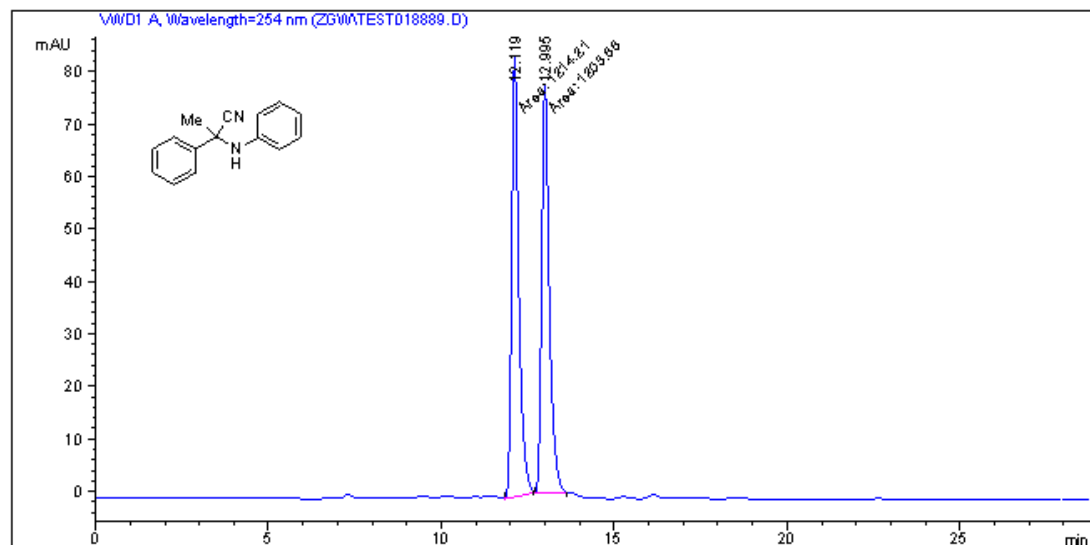

Signal 1: VWD1 A, Wavelength=254 nm

| Peak # | RetTime [min] | Type | Width [min] | Area mAU   | Area %  | Height [mAU] |
|--------|---------------|------|-------------|------------|---------|--------------|
| 1      | 12.119        | MM   | 0.2417      | 1214.21057 | 50.2182 | 83.72997     |
| 2      | 12.995        | MM   | 0.2579      | 1203.65918 | 49.7818 | 77.77955     |

Totals : 2417.86975 161.50951

Sample Info : 254nm,AD-H,i-PrOH:Hexane=20:80,0.5mL/min

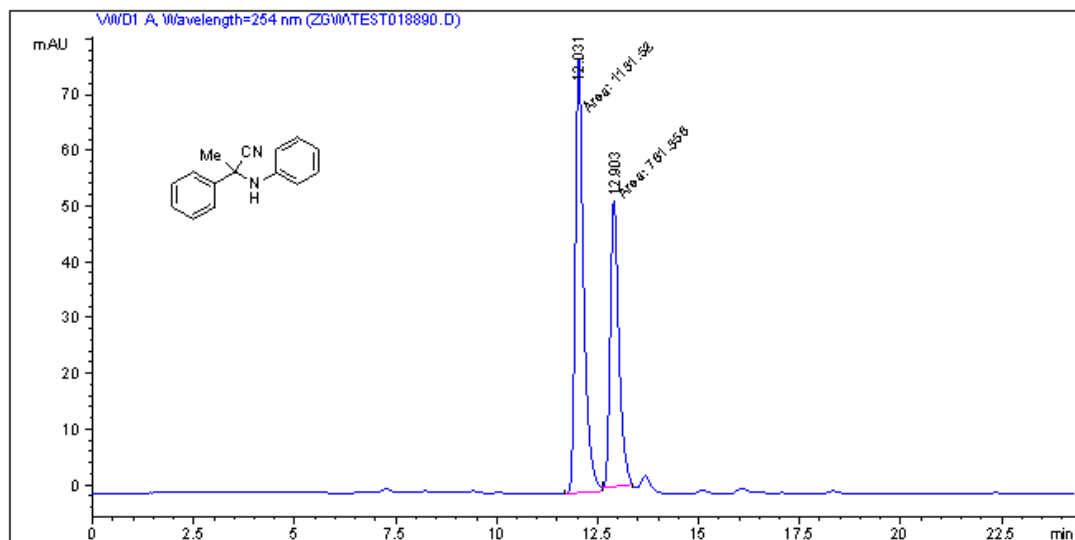

Signal 1: VWD1 A, Wavelength=254 nm

| Peak # | RetTime [min] | Type | Width [min] | Area mAU   | Area %  | Height [mAU] |
|--------|---------------|------|-------------|------------|---------|--------------|
| 1      | 12.031        | MM   | 0.2417      | 1131.51538 | 59.7777 | 78.03770     |
| 2      | 12.903        | MM   | 0.2476      | 761.35754  | 40.2223 | 51.25764     |

Totals : 1892.87292 129.29534

Sample Info : 254nm,AD-H,i-PrOH:Hexane=20:80,0.5mL/min

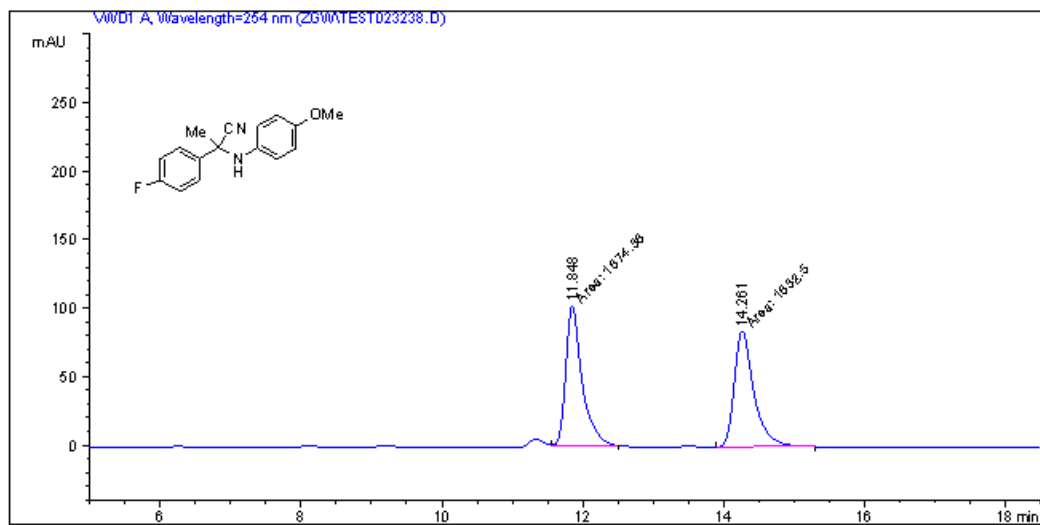

Signal 1: VWD1 A, Wavelength=254 nm

| Peak # | RetTime [min] | Type | Width [min] | Area [mAU] | Area %  | Height [mAU] | Area %  |
|--------|---------------|------|-------------|------------|---------|--------------|---------|
| 1      | 11.848        | MM   | 0.2712      | 1674.37903 | 50.6332 | 102.88712    | 50.6332 |
| 2      | 14.261        | MM   | 0.3217      | 1632.50000 | 49.3668 | 84.56818     | 49.3668 |

Totals : 3306.87903 187.45530

Sample Info : 254nm,AD-H,i-PrOH:Hexane=20:80,0.5mL/min

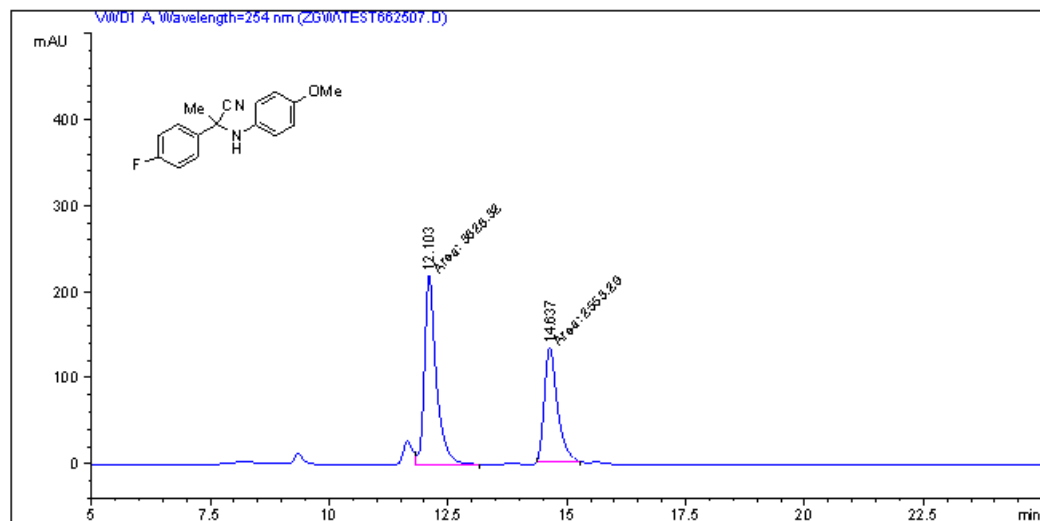

Signal 1: VWD1 A, Wavelength=254 nm

| Peak # | RetTime [min] | Type | Width [min] | Area [mAU] | Area %  | Height [mAU] | Area %  |
|--------|---------------|------|-------------|------------|---------|--------------|---------|
| 1      | 12.103        | MM   | 0.2888      | 3828.31714 | 59.9899 | 220.89569    | 59.9899 |
| 2      | 14.637        | MM   | 0.3210      | 2553.28662 | 40.0101 | 132.58116    | 40.0101 |

Totals : 6381.60376 353.47685
